# Supplementary material for: RNA interference as a gene silencing tool to control Tuta absoluta in tomato (Solanum lycopersicum)
Source: PeerJ. 2016 Dec 15;4:e2673. doi: 10.7717/peerj.2673 (PMC5162399; doi:10.7717/peerj.2673)
Supplement: Data S1 — These results are displayed in the text in Fig. 2A [file peerj-04-2673-s011.xlsx]

## Sheet: ATPase
ATPase		Target gene Ct	mean		Normalizer	mean
GFP 24 hrs 1		22.91	22.95		14.19	14.25
		22.99			14.31
GFP 24 hrs 2		23.18	23.225		14.47	14.46
		23.27			14.45
GFP 48 hrs 1		22.6	22.65		13.67	13.715
		22.7			13.76
GFP 48 hrs 2		23.57	23.52		14.66	14.5
		23.47			14.34
GFP 72 hrs 1		23.98	23.845		14.39	14.355
		23.71			14.32
GFP 72 hrs 2		23.24	23.32		14.2	14.275
		23.4			14.35
								ΔCt Target		ΔCt NOR		E^ΔCt	E^ΔCt	E		Mean	StandDev	T test			24 h
ATPase 24 hrs 1		24.08	24.075		15.48	15.455		-1.125		-1.205		0.466365	0.436397	1.06867		1.04087	0.133548				48 h
		24.07			15.43																72 h
ATPase 24 hrs 2		23.12	23.195		14.67	14.705		-0.245		-0.455		0.846946	0.731176	1.15833				1.06867	1
		23.27			14.74													1.15833	1
ATPase 24 hrs 3		22.6	22.595		13.77	13.74		0.355		0.51		1.27214	1.42041	0.895613				0.895613	1
		22.59			13.71
ATPase 48 hrs 1		23.85	23.875		14.66	14.65		-0.355		-0.15		0.786076	0.901928	0.87155		0.74133	0.112785
		23.9			14.64
ATPase 48 hrs 2		24.37	24.41		14.83	14.805		-0.89		-0.305		0.546922	0.810681	0.674645				0.87155	1
		24.45			14.78													0.674645	1
ATPase 48 hrs 3		24.17	24.19		14.56	14.595		-0.67		-0.095		0.634903	0.936718	0.677795				0.677795	1
		24.21			14.63													0.0289599
ATPase 72 hrs 1		24.41	24.435		14.48	14.44		-1.115		-0.165		0.469537	0.892667	0.525994		0.602782	0.0736984
		24.46			14.4
ATPase 72 hrs 2		23.9	23.96		14.28	14.33		-0.64		-0.055		0.64795	0.96286	0.672943				0.525994	1
		24.02			14.38													0.672943	1
ATPase 72 hrs 3		23.94	24.02		14.26	14.245		-0.7		0.03		0.622119	1.02086	0.609408				0.609408	1
		24.1			14.23													0.00564038

## Sheet: AK
AK		Target gene Ct	mean		Normalizer	mean
GFP 24 hrs 1		19.21	18.995		14.96	14.58
		18.78			14.2
GFP 24 hrs 2		19.09	19.03		14.86	14.905
		18.97			14.95
GFP 48 hrs 1		19.9	19.92		14.14	14.075
		19.94			14.01
GFP 48 hrs 2		19.9	19.97		15.2	15.27
		20.04			15.34
GFP 72 hrs 1		21.1	20.97		14.83	14.675
		20.84			14.52
GFP 72 hrs 2		19.79	19.725		14.48	14.48
		19.66			14.48
								ΔCt Target		ΔCt NOR		E^ΔCt	E^ΔCt	E	Mean	StandDev	T test
AK 24 hrs 1		19.39	19.35		15.03	15.065		-0.32		-0.16		0.804954	0.895743	0.898643		0.92784	0.100725
		19.31			15.1
AK 24 hrs 2		19.22	19.16		15.09	15.09		-0.13		-0.185		0.915629	0.880465	1.03994
		19.1			15.09											0.898643	1
AK 24 hrs 3		19.09	19.04		14.86	14.67		-0.01		0.235		0.993243	1.17552	0.844938		1.03994	1
		18.99			14.48											0.844938	1
															t test	0.170233
AK 48 hrs 1		20.18	20.175		15.13	15.105		-0.205		0.165		0.870231	1.12024	0.776826		0.719709	0.1254
		20.17			15.08
AK 48 hrs 2		20.12	20.125		15.17	15.11		-0.155		0.16		0.900239	1.11639	0.806383		0.776826	1
		20.13			15.05											0.806383	1
AK 48 hrs 3		20.91	20.865		15.41	15.35		-0.895		-0.08		0.545071	0.946437	0.575918		0.575918	1
		20.82			15.29										t test	0.0303539
AK 72 hrs 1		21.05	21.005		15.03	15.08		-1.28		-0.6		0.419839	0.661741	0.634447		0.5915	0.03797
		20.96			15.13
AK 72 hrs 2		21	20.65		14.54	14.555		-0.925		-0.075		0.534095	0.949699	0.562384		0.634447	1
		20.3			14.57											0.562384	1
AK 72 hrs 3		20.53	20.58		14.51	14.525		-0.855		-0.045		0.560056	0.969508	0.57767		0.57767	1
		20.63			14.54										t test	0.00143375
			24 h
			48 h
			72 h
